# Supplementary material
Source: Springer Nature journal article supplement (https://www.springermedizin.de/resource/supplementary/12967_2008_242_MOESM11_ESM.pdf/9576012)

A. H&E

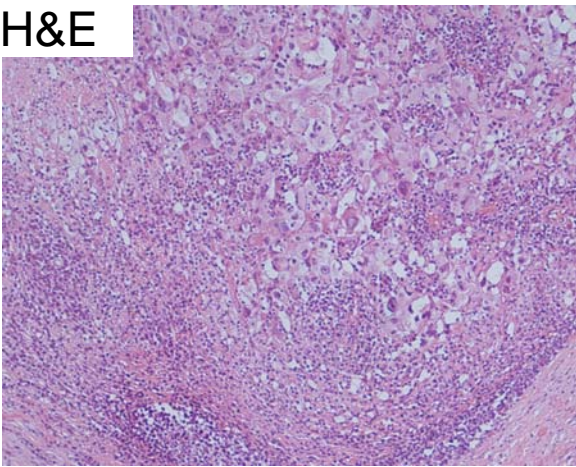

B. Pancreas

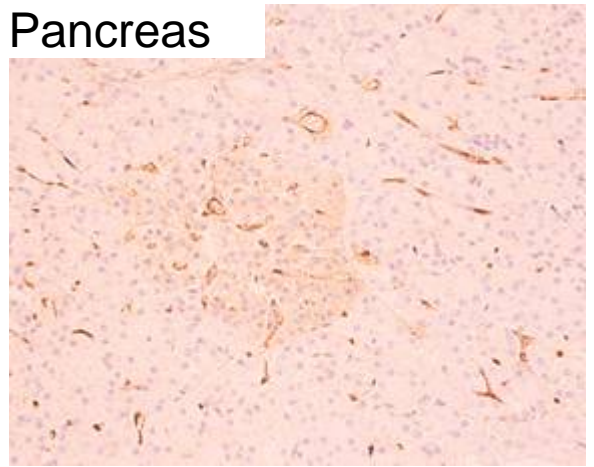

Control

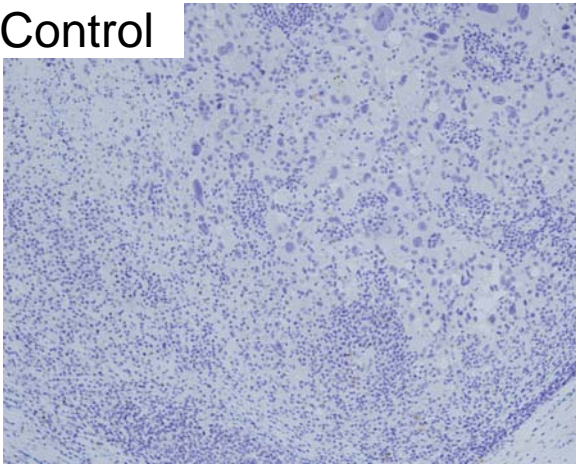

Unrelated Melanoma

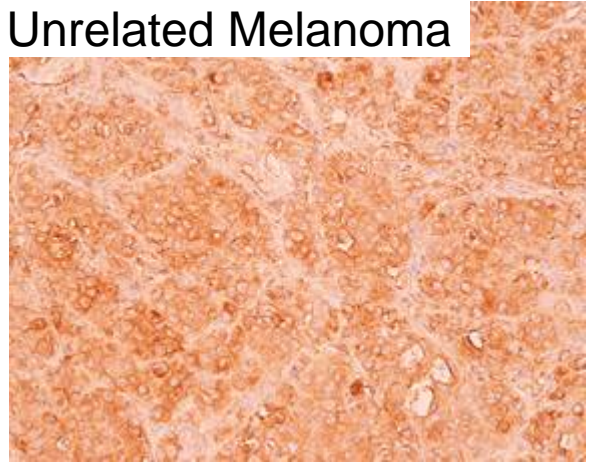

MART1 + CD8

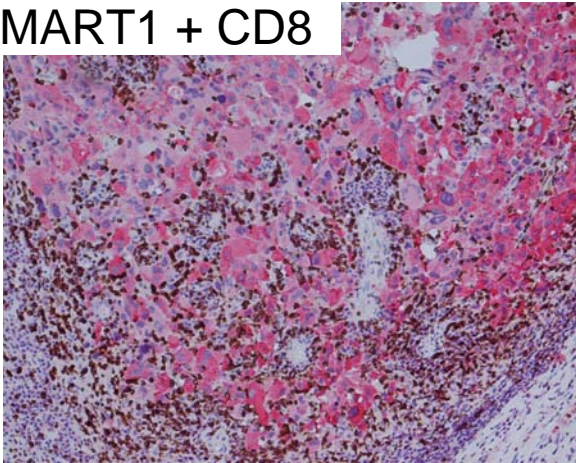

P14: Residual Metastasis

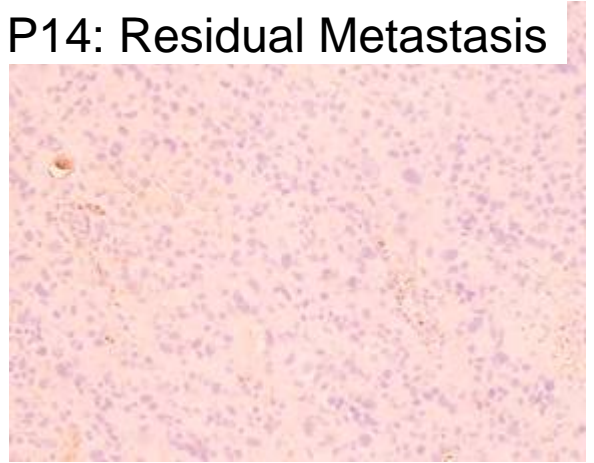

C.

**+ DAB/IL2 (4 Cycles)**

-1 Week

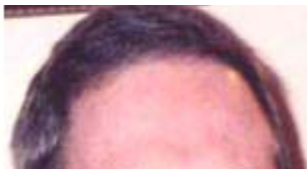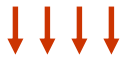

+4 Months

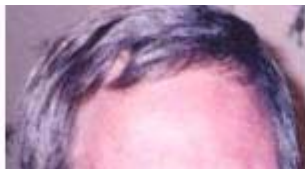

+6 Months

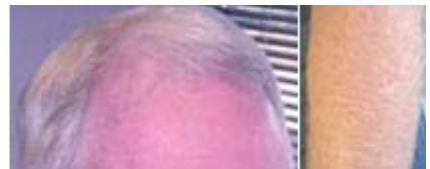

Supplement: MOESM11 [file 9576012]
